# Supplementary material
Source: Springer Nature journal article supplement (https://www.springermedizin.de/resource/supplementary/12903_2008_115_MOESM1_ESM.pdf/9517424)

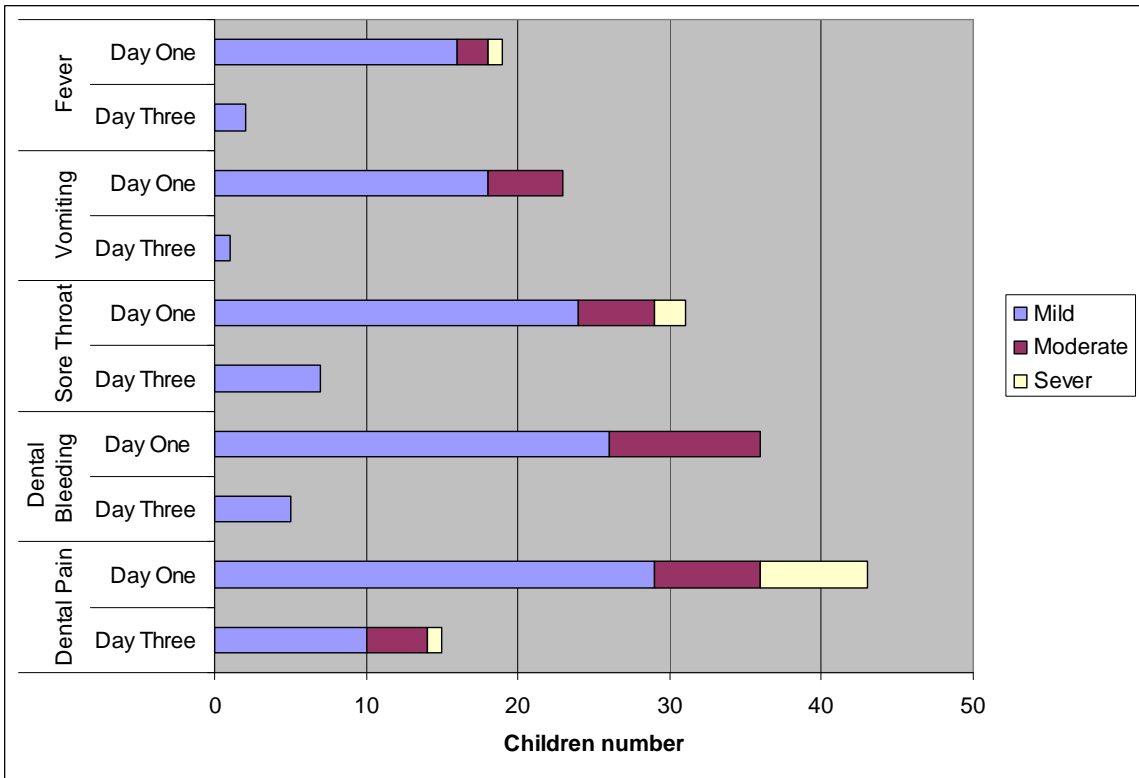

*P value of difference in severity of all complaints < 0.005 using Wilcoxon signed ranks test*

Supplement: MOESM1 [file 9517424]
